# Supplementary material for: Copper(ii) complexes with 2NO and 3N donor ligands: synthesis, structures and chemical nuclease and anticancer activities
Source: Royal Society of Chemistry journal article supplement (doi:10.1039/c3dt32992e), 2013-01-01
Supplement: c3dt32992e.pdf [file c3dt32992e.pdf]

## Supplementary Data

Submitted to : Dalton Transactions  
Manuscript type : Full Paper  
Manuscript id : DT-ART-12-2012-032992-R2

### **Copper(II) Complexes with 2NO and 3N Donor Ligands: Synthesis, Structures and Chemical Nuclease and Anticancer Activities**

Chandrasekaran Rajarajeswari,<sup>a</sup> Rangasamy Loganathan,<sup>b</sup> Mallayan Palaniandavar,<sup>b,\*</sup> Eringathodi Suresh,<sup>c</sup> Anvarbatcha Riyasdeen,<sup>d</sup> and Mohamad Abdulkadhar Akbarsha<sup>e,f</sup>

<sup>a</sup>*School of Chemistry, Bharathidasan University, Tiruchirappalli – 620 024, Tamil Nadu, India*

<sup>b</sup>*Department of Chemistry, Central University of Tamil Nadu, Thiruvavur 610004, Tamil Nadu, India*

<sup>c</sup>*Analytical Science Discipline, Central Salt and Marine Chemical Research Institute, Bhavnagar 364 002, India*

<sup>d</sup>*Department of Animal Science, Bharathidasan University, Tiruchirappalli – 620 024, Tamil Nadu, India*

<sup>e</sup>*Mahatma Gandhi-Doerenkamp Center for Alternatives to use of Animals in Life Science Education, Bharathidasan University, Tiruchirappalli, 620024, Tamil Nadu, India*

<sup>f</sup>*Visiting Professor, Department of Food Sciences and Nutrition, College of Food Sciences and Agriculture, King Saud University, Riyadh-11451, Kingdom of Saudi Arabia*

---

\*To whom correspondence should be addressed, e-mail: [palanim51@yahoo.com](mailto:palanim51@yahoo.com) and [palaniandavarm@gmail.com](mailto:palaniandavarm@gmail.com)

## Synthesis of Ligands

All the six ligands L1 - L6 were prepared using known procedures, which involve the reaction of salicylaldehyde, 5-methylsalicylaldehyde, pyridine-2-carboxaldehyde, imidazole-2-carboxaldehyde, and quinoline-2-carboxaldehyde with 2-aminoethylbenzimidazole hydrochloride and 2-aminoethylpyridine to form Schiff bases. 2-Aminoethylbenzimidazole dihydrochloride<sup>41</sup> was prepared according to methods reported in the literature.

### Synthesis of 2-(2-(1*H*-benzimidazol-2-yl)ethyliminomethyl)phenol H(L1)

This ligand was synthesized by reported procedure.<sup>42</sup> 2-Aminoethylbenzimidazole dihydrochloride (1.35 g, 5 mmol) dissolved in water (20 ml) was added with stirring to aqueous K<sub>2</sub>CO<sub>3</sub> solution (0.83 g, 6 mmol). A solution of salicylaldehyde (0.610 g, 5 mmol) in methanol (10 ml) was then added dropwise to this solution over 1 h. During this period, yellow colored solid H(L1) separated out slowly. The solid was filtered off, washed thoroughly with water and then dried in vacuum at room temperature. It was finally recrystallized from methanol. Yield: 1.06 g (80%).

### Synthesis of 2-(2-(1*H*-benzimidazol-2-yl-ethylimino)methyl)-4-methylphenol H(L2)

2-Aminoethylbenzimidazole dihydrochloride (1.35 g, 5 mmol) dissolved in water (20 ml) was added with stirring to aqueous K<sub>2</sub>CO<sub>3</sub> solution (0.83 g, 6 mmol). A solution of 5-methylsalicylaldehyde (0.680 g, 5 mmol) in methanol (10 ml) was then added dropwise to this solution over 1 h. During this period, yellow colored solid H(L2) separated out slowly. The solid was filtered off, washed thoroughly with water and then dried in vacuum at room temperature. It was finally recrystallized from methanol. Yield: 1.12 g (81%).

### Synthesis of (2-pyridin-2-yl-ethyl)pyridin-2-ylmethyleamine L3

This ligand was synthesized by reported procedure<sup>43</sup> by treating 2-aminoethylpyridine (0.61 g, 5 mmol) with pyridine-2-carboxaldehyde (0.535 g, 5 mmol) and stirring the reaction mixture for 18 h and the solvent removed under reduced pressure. The product L3 obtained as pale yellow oil was used without further purification for isolation of the copper(II) complex. Yield: 0.84 g (80%).

### Synthesis of 2-(1*H*-benzimidazol-2-yl)ethylpyridin-2-ylmethyleamine L4

This ligand was synthesized by reported procedure<sup>44</sup> by treating 2-Aminoethylbenzimidazole dihydrochloride (1.35 g, 5 mmol) dissolved in water (20 ml) was added with stirring to aqueous K<sub>2</sub>CO<sub>3</sub> solution (0.83 g, 6 mmol). A solution of pyridine-2-carboxaldehyde (0.535 g, 5 mmol) in methanol (10 ml) was then added dropwise to this solution over 1 h. During this period a colorless solid L4 separated out slowly. The solid was filtered off, washed thoroughly with water and dried in vacuum at room temperature. It was finally recrystallized from methanol. Yield: 0.93 g (75%).

### Synthesis of 2-(1*H*-benzimidazol-2-yl)ethyl(1*H*-imidazol-2-ylmethyle)amine L5

The ligand L5 was prepared by the same method adopted for the preparation of L4 except that imidazole-2-carboxaldehyde (0.48 g, 5mmol) was used instead of pyridine-2-carboxaldehyde. Yield: 0.87 g (73%).

### Synthesis of 2-(1*H*-benzimidazol-2-yl)ethyl-(4,4a-dihydroquinolin-2-ylmethyle)- amine L6

The ligand L6 was prepared by the same method adopted for the preparation of L4 except that quinoline-2-carboxaldehyde (0.79 g, 5 mmol) was used instead of pyridine-2-carboxaldehyde. Yield: 1.05 g (70%).

### Synthesis of Complexes

#### Synthesis of [Cu(L1)Cl] 1

A methanolic solution (10 ml) of copper(II) chloride dihydrate (0.17 g, 1 mmol) was added to a solution of H(L1) (0.265 g, 1 mmol) in methanol with constant stirring. Green color clear solution was obtained. Single crystals suitable for X-ray diffraction was obtained by slow evaporation of the complex in methanol:acetonitrile solvent mixture. Yield: 0.290 g (84%). Anal. Calcd for CuC<sub>16</sub>H<sub>14</sub>N<sub>3</sub>ClO: C, 52.90; H, 3.88; N, 11.57. Found: C, 52.76; H, 3.84; N, 11.52%. ESI-MS  $m/z$  = 327 [Cu(L1)]<sup>+</sup>.

### Synthesis of [Cu(L2)Cl] 2

A methanolic solution (10 ml) of copper(II) chloride dihydrate (0.17 g, 1 mmol) was added to a solution of H(L2) (0.279 g, 1 mmol) in methanol with constant stirring. A clear green colored solution was obtained. Single crystals suitable for X-ray diffraction were obtained by slow evaporation of a methanolic solution of the complex. Yield: 0.320 g (85%). Anal. Calcd for  $\text{CuC}_{17}\text{H}_{16}\text{N}_3\text{ClO}$ : C, 54.11; H, 4.27; N, 11.14. Found: C, 53.97; H, 4.22; N, 11.10%. ESI-MS  $m/z = 341$   $[\text{Cu}(\text{L2})]^+$ .

### Synthesis of [Cu(L3)Cl<sub>2</sub>] 3

Copper(II) chloride dihydrate (0.17 g, 1 mmol) was dissolved in methanol (10 ml) was added with constant stirring to a methanolic solution of L3 (0.211 g, 1 mmol). The green color precipitate formed was filtered off, washed with cold methanol and diethyl ether, and then dried under vacuum. Yield: 0.260 g (75%). Anal. Calcd for  $\text{CuC}_{13}\text{H}_{13}\text{N}_3\text{Cl}_2$ : C, 45.16; H, 3.79; N, 12.15. Found: C, 45.12; H, 3.76; N, 12.15%. ESI-MS  $m/z = 309$   $[\text{Cu}(\text{L3})\text{Cl}]^+$ .

### Synthesis of [Cu(L4)Cl<sub>2</sub>] 4

To a methanolic solution of L4 (0.250 g, 1 mmol) was added a solution of copper(II) chloride dihydrate (0.17 g, 1 mmol) dissolved in methanol (10 ml) with constant stirring. The green colored precipitate formed was filtered off, washed with cold methanol and diethyl ether, and then dried under vacuum. Single crystals suitable for X-ray diffraction were obtained by slow evaporation of a methanolic solution of the complex. Yield: 0.290 g (75%). Anal. Calcd for  $\text{CuC}_{15}\text{H}_{14}\text{N}_4\text{Cl}_2$ : C, 46.83; H, 3.67; N, 14.56. Found: C, 46.78; H, 3.63; N, 14.55%. ESI-MS  $m/z = 348$   $[\text{Cu}(\text{L4})\text{Cl}]^+$ .

### Synthesis of [Cu(L5)Cl<sub>2</sub>] 5

A methanolic solution (10 ml) of copper(II) chloride dihydrate (0.17 g, 1 mmol) was added to a solution of L5 (0.239 g, 1 mmol) in methanol with constant stirring. The green colored precipitate formed was filtered off, washed with cold methanol and diethyl ether, and then dried under vacuum. Yield: 0.260 g (70%). Anal. Calcd for  $\text{CuC}_{13}\text{H}_{13}\text{N}_5\text{Cl}_2$ : C, 41.78; H, 3.51; N, 18.74. Found: C, 41.74; H, 3.48; N, 18.73%. ESI-MS  $m/z = 337$   $[\text{Cu}(\text{L5})\text{Cl}]^+$ .

### Synthesis of [Cu(L6)Cl<sub>2</sub>] 6

A methanolic solution (10 ml) of copper(II) chloride dihydrate (0.17 g, 1 mmol) was added to a solution of L6 (0.300 g, 1 mmol) in methanol with constant stirring. The green colored complex formed was filtered off, washed with cold methanol and diethyl ether, and then dried under vacuum. Single crystals suitable for X-ray diffraction were obtained by slow evaporation of a methanolic solution of the complex. Yield: 0.300 g (70%). Anal. Calcd for CuC<sub>19</sub>H<sub>16</sub>N<sub>4</sub>Cl<sub>2</sub>: C, 52.48; H, 3.71; N, 12.89. Found: C, 52.44; H, 3.68; N, 12.88%. ESI-MS  $m/z$  = 398 [Cu(L6)Cl]<sup>+</sup>.

**Table S1:** Calculated and observed ESI-MS data for complexes **1** – **6**.

| Complex | Molecular ion                                                      | m/z (Found/Calculated) | Relative intensity |
|---------|--------------------------------------------------------------------|------------------------|--------------------|
| 1       | $[\text{CuC}_{16}\text{H}_{14}\text{N}_3\text{O}]^+$ ( <b>1</b> )  | 327/327.053            | 100%               |
| 2.      | $[\text{CuC}_{17}\text{H}_{16}\text{N}_3\text{O}]^+$ ( <b>2</b> )  | 341/341.069            | 100%               |
| 3       | $[\text{CuC}_{13}\text{H}_{13}\text{N}_3\text{Cl}]^+$ ( <b>3</b> ) | 309/309.019            | 100%               |
| 4       | $[\text{CuC}_{15}\text{H}_{14}\text{N}_4\text{Cl}]^+$ ( <b>4</b> ) | 348/348.030            | 100%               |
| 5       | $[\text{CuC}_{13}\text{H}_{13}\text{N}_5\text{Cl}]^+$ ( <b>5</b> ) | 337/337.026            | 100%               |
| 6       | $[\text{CuC}_{19}\text{H}_{16}\text{N}_4\text{Cl}]^+$ ( <b>6</b> ) | 398/398.046            | 100%               |
